1           **Development of whole-porcine monoclonal antibodies with potent neutralization**  
2           **activity against classical swine fever virus (CSFV) from single B cells**

3    Haisi Dong,<sup>a</sup> Dongmei Lv,<sup>a</sup> Ang Su,<sup>a</sup> Lerong Ma,<sup>a</sup> Jianwei Dong,<sup>a</sup> Nannan Guo,<sup>a</sup> Linzhu Ren,<sup>a</sup> Huping  
4    Jiao,<sup>a</sup> Daxin Pang,<sup>a#</sup> Hongsheng Ouyang<sup>a#</sup>

5    <sup>a</sup>Jilin Provincial Key Laboratory of Animal Embryo Engineering, College of Animal Science,  
6    Jilin University, Changchun, Jilin Province, People's Republic of China

7    Running Head: Isolation of monoclonal antibodies against CSFV from single B cells

8    #Address correspondence to: Hongsheng Ouyang (ouyh@jlu.edu.cn) and Daxin Pang,  
9    ([pdx@jlu.edu.cn](mailto:pdx@jlu.edu.cn))

10   Haisi Dong and Dongmei Lv contributed equally to this work.

11   \*Present address: Jilin Provincial Key Laboratory of Animal Embryo Engineering, College of  
12   Animal Science, Jilin University, 5333 Xi'an Road, Lvyuan District, Changchun 130062, Jilin  
13   Province, People's Republic of China.

14   Abstract: 219 words

15   Text: 5616 words

16

17 **Abstract (max 250 words, currently 219)**

18 Classical swine fever (CSF) is a highly contagious swine disease found worldwide that has  
19 caused devastating economic losses. However, there are few efficacious mAbs against the  
20 CSF virus (CSFV) that can be used for treatment because most mAbs against CSFV are  
21 derived from mouse hybridoma cells and these murine mAbs have disadvantages of  
22 inefficient effector functions elicitation and high immunogenicity *in vivo*. Accordingly, we  
23 characterized whole-porcine anti-CSFV neutralizing mAbs (NAbs) isolated directly from  
24 single B cells sorted from a CSFV-vaccinated pig using the fluoresceinated conserved linear  
25 neutralizing epitope of the CSFV E2 protein and fluorophore conjugated goat anti-pig IgG.  
26 Immunoglobulin (Ig) genes were isolated via nested PCR, and two porcine mAbs termed  
27 HK24 and HK44 were produced. We determined that these mAbs can bind to E2 protein and  
28 recognize sites within this major antigenic epitope. In addition, we found that mAbs HK24  
29 and HK44 exhibit potent neutralizing activity against CSFV, and they can protect PK-15 cells  
30 from infections *in vitro* with potent IC<sub>50</sub> values of 9.3 µg/ml and 0.62 µg/ml, respectively.  
31 Notably, we demonstrated that these two mAbs can be used as novel reagents for detecting  
32 virus infection. These data suggest that our results not only provide a method for efficiently  
33 obtaining mAbs against CSFV but also offer promising mAb candidates for development of  
34 antibody-based diagnostic and antiviral agents.

35 **Keywords:** Classical swine fever; epitope of E2 protein; whole-porcine anti-CSFV  
36 neutralizing mAbs; single B cells;

38 **Importance (max 150 words, currently 123)**

39 Neutralizing monoclonal antibodies (NAbs) can prevent and may slow the spread of virus  
40 infection. The discovery of NAbs that recognize classical swine fever virus (CSFV)  
41 necessitates new technologies because the NAbs produced by immunization and hybridoma  
42 technology could not be transferred to *in vivo* research. Multiple full-length human  
43 therapeutic antibodies have been produced via single-cell polymerase chain reactions but  
44 whole-porcine NAbs for CSFV have not been generated. In this study, two whole-porcine  
45 mAbs, named HK24 and HK44, were isolated from epitope-specific single B cells. We  
46 demonstrate that these two mAbs have potent neutralizing activity against CSFV and can  
47 protect cells against viral infection. Therefore, they may facilitate the development of  
48 vaccines or antiviral drugs that offer the advantages of stability and low immunogenicity.

## 50 Introduction

51 Classical swine fever (CSF) caused by classical swine fever virus (CSFV) is a highly  
52 contagious and fatal viral swine disease that remains a serious problem for the pork industry  
53 (1-3). CSFV is an enveloped virus with positive-sense RNA and belongs to the genus  
54 *Pestivirus* of the family *Flaviviridae* (4). The mature CSFV virion contains twelve viral  
55 proteins, N<sup>pro</sup>, C, E<sup>ms</sup>, E1, E2, p7, NS2, NS3, NS4A, NS4B, NS5A, and NS5B (5). E2 is a  
56 protein with multiple functions that can form a dimer with E1 and mediate virion entry into  
57 target cells; additionally, it is the major antigen for the production of neutralizing antibodies  
58 that protect the body from the virus. The ability of an anti-E2 antibody to neutralize CSFV has  
59 previously been characterized in detail (6, 7). The E2 protein consists of four antigen domains,  
60 A, B, C, and D, at the N-terminus with a total of 177 amino acids, ranging from amino acids  
61 690 to 866. These domains contain some conformational epitopes and linear epitopes that  
62 play critical roles in inducing neutralizing antibodies. Comparison of the different epitopes of  
63 the E2 protein has demonstrated that the linear epitope CTAVSPTTLRTEVVK, found  
64 between amino acids 828 and 842, a region recognized by the monoclonal antibody WH303,  
65 is strongly conserved in different CSFV strains but is highly divergent among bovine virus  
66 diarrhoea virus (BVDV) and border disease virus (BDV) strains (8, 9).

67 NAbs that are capable of directly neutralizing most strains of a given highly antigenic  
68 variable pathogen have attracted considerable attention because they can be used to treat some of  
69 the difficult infectious diseases encountered in modern medicine and have potential for  
70 development of passive immunotherapy treatment or vaccine reagents (10). In addition, given  
71 their potential antiviral effects, NAbs also play an essential role in studying the  
72 structure-function properties of infectious agents and related pathogenesis. However, mAbs of  
73 mouse origin that are produced by hybridoma technology cannot be applied in *in vivo*  
74 research because they can induce the production of anti-mouse antibodies *in vivo*, leading to a  
75 short half-life (11-13). Other traditional methods of generating mAbs, such as Epstein-Barr  
76 virus-transformation and phage-display libraries, are limited by being unstable, time  
77 consuming or inefficient (14, 15). With the advent of single-cell reverse transcription PCR  
78 (RT-PCR) technologies, the amplification of full-length immunoglobulin gene (Ig) fragments  
79 from single B cells by utilizing nested PCR has allowed the bypass of many of these  
80 limitations and this technology has been shown to provide a versatile tool for generation of  
81 new mAbs; this is an important advancement in mAbs production (16, 17). Prior to the  
82 amplification of Ig-encoding genes, antigen-specific memory B cells must be stained with  
83 fluorescently-labelled antigen baits and then sorted. Several human mAbs against HIV, ZIKV  
84 and Ebola virus have been obtained through this technology (18-20). However, the production  
85 of whole-porcine mAbs against the E2 protein of CSFV using linear specific-epitopes has not  
86 been reported. Whole-porcine neutralizing antibodies usually exhibit the lowest  
87 immunogenicity, longer half-lives and have a great potential for superior applications in *in*  
88 *vivo* (21, 22).

89 In this study, we report the acquisition of the whole-porcine mAbs HK24 and HK44.  
90 These mAbs were isolated from single B cells of a vaccinated pig using the fluoresceinated  
91 epitope CTAVSPTTLRTEVVK and fluorescein isothiocyanate (FITC)-labelled goat anti-pig  
92 IgG via fluorescent-activated cell sorting (FACS) (23). Their ability to significantly neutralize  
93 CSFV was identified through a panel of assays. We also confirmed that these mAbs

94 demonstrate significant value for the serological diagnosis of CSFV infection. Together, the  
95 porcine mAbs HK24 and HK44 show potential as candidates for immunotherapy or  
96 diagnostic reagents.

97

## 98 **Results**

### 99 **Isolation of single B cells from a vaccinated pig and mAb generation**

100 Individual pigs were immunized with an attenuated vaccine strain of CSFV to generate a  
101 spectrum of antibody responses ranging from low to high levels of blocking, which was  
102 determined using the Classical Swine Fever Virus Antibody Test Kit (IDEXX, Switzerland);  
103 unvaccinated pigs served as negative controls (**Fig. 1A**). As shown in **Fig. 1B**, pigs #3748 and  
104 #3757 exhibited a high blocking rate; therefore, blood samples from pig #3748 were used to  
105 isolate single B cells that were stained with FITC-conjugated anti-pig IgG and  
106 5-TAMRA-conjugated epitope-76 via FACS. Epitope-76 is strongly conserved in different  
107 CSFV strains but is highly divergent among the BVDV and BDV strains, as shown in **Fig. 1C**.  
108 As shown in **Fig. D**, epitope-specific IgG<sup>+</sup> B cells constituted approximately 0.39% of the cell  
109 population. Full-length heavy- and light-chain antibody genes were amplified from the cDNA  
110 of single purified B cells via nested PCR and were sequenced. All nine antibodies were  
111 obtained from one hundred single epitope-specific IgG<sup>+</sup> B cells. Nucleotide sequence analysis  
112 of these genes demonstrated that they could be divided into four different groups. Some of  
113 these antibodies shared the same *IgH* and *IgL* genes, and most clones were somatic variants of  
114 the IGHV1-4\*02 and IGKV1-11\*01/IGKV2-10\*02 germline genes (**Fig. 1E**). This result was  
115 similar to that obtained in a study of ZIKV (20).

116 In summary, we deduced that individuals with high serologic neutralizing titres against  
117 the same epitopes of CSFV may express isotype antibodies. We also found that the mAbs  
118 HK24 and HK44 each had a long complementarity determining 3 region of antibody  
119 heavy-chain (CDR H3) loop composed of 17 and 21 amino acids, respectively. The antibody  
120 gene pairs HK24 *IgH*, *IgK* and HK44 *IgH*, *IgK* were selected to produce mAbs, which were  
121 identified via SDS-PAGE. Polyclonal antibody IgGs were isolated from porcine serum by  
122 protein A were served as a positive control (**Fig. 1F**).

123

### 124 **The mAbs HK24 and HK44 can bind to specific epitopes of CSFV**

125 To map the epitopes of the mAbs HK24 and HK44, we first checked whether these  
126 mAbs react with epitope-76. For this purpose, HEK293T cells were used for the transient  
127 expression of mAb HK24 or HK44, and the binding activity of the mAbs HK24 and HK44 to  
128 FITC-conjugated epitope-76 (20 µg/ml) was detected and analysed through microscopy. As  
129 shown in **Fig. 2A**, there was a high level of green fluorescence in cells transfected with the  
130 expression vector for either HK24 or HK44, and cells without expression vectors showed no  
131 green fluorescence. This result indicated that HK24 and HK44 could bind to the conserved  
132 epitope-76 with a higher affinity. This distinctive feature of the mAbs HK24 and HK44 was  
133 further confirmed by flow cytometric analysis, as shown in **Fig. 2B**. FACS results indicated  
134 that a higher percentage of HEK293T cells expressing HK24 or HK44 was stained by  
135 FITC-conjugated epitope-76 (60.7% and 40.8%, respectively) than HEK293T cells that did  
136 not express HK24 and HK44 (0.128%).

137 We also performed a direct fluorescence experiment to ascertain whether the mAbs

138 HK24 or HK44 possess binding specificity to epitope-76. As shown in **Fig. 2C**, the mAbs  
139 HK24 and HK44, as well as positive IgGs purified from pig #3748, were recognized  
140 efficiently by epitope-76, while HK24 and HK44 did not bind to the unrelated epitope-75  
141 which is a linear epitope on the E2 protein of CSFV. Meanwhile, the positive IgGs interacted  
142 efficiently with both epitope-76 and epitope-75.

143 In summary, these data demonstrated that the mAbs HK24 and HK44 can be specifically  
144 recognized by epitope-76 with a high affinity.

145

### 146 **The mAbs HK24 and HK44 exhibit high specificity and sensitivity to the CSFV E2** 147 **protein**

148 The reactivity between the mAbs and the CSFV E2 protein was deciphered via Western  
149 blotting. The results showed that the 55-kDa E2 protein band from lysates of CSFV-infected  
150 cells was clearly detected by the mAbs HK24 and HK44 with high specificity, unlike the  
151 lysates of uninfected cells (**Fig. 3A and 3B**).

152 To further verify the reactivity of the mAbs HK24 and HK44 with the CSFV E2 protein,  
153 recombinant E2 protein was subsequently produced and used to detect antibody affinity via  
154 Western blotting. As expected, the mAbs HK24 and HK44 reacted with recombinant E2 with  
155 high specificity (**Fig. 3C**). Indirect ELISA also showed that the mAbs HK24 and HK44  
156 exhibited excellent affinity for the recombinant E2 protein, and binding occurred in a  
157 dose-dependent manner, whereas negative IgGs (isolated from CSFV-negative swine serum  
158 by protein A) did not show significant reactivity (**Fig. 3D**). Together, these results  
159 demonstrated that the mAbs HK24 and HK44 possess specific reactivity with either CSFV E2  
160 protein in cells or purified recombinant E2 protein.

161 Additionally, to investigate whether the mAbs HK24 and HK44 could be applied for  
162 CSFV detection, these antibodies were used to detect CSFV in PK-15 cells via an  
163 immunofluorescence assay. As shown in **Fig. 3E**, the mAbs HK24 and HK44 showed strong  
164 fluorescence at 30 nM, as observed for CSFV-positive serum, unlike CSFV-negative serum.  
165 This result suggested that both mAbs isolated in the present study could be used to detect  
166 CSFV. Hence, our results suggested that the mAbs HK24 and HK44 exhibited high sensitivity  
167 towards E2 of CSFV and can be used for the serological detection of CSFV infection or for  
168 research purposes.

169

### 170 **Evaluation of the binding affinity of mAbs HK44 and HK24 to E2 protein by SPR**

171 SPR is a powerful technique that provides affinity and kinetic information for  
172 protein-protein interactions (24, 25). Thus, SPR was used to assess the ability of the mAbs  
173 HK44 and HK24 to bind the recombinant protein E2. For this purpose, the mAbs HK44 and  
174 HK24 were immobilized on CM5 sensor chips with a general 1:1 interaction; the results are  
175 shown in **Fig. 4**. As shown in **Fig. 4A and 4B**, SPR dose-dependent binding assays verified  
176 that the mAbs HK44 and HK24 bound the E2 protein with high affinity at E2 protein  
177 concentrations ranging from 125 nM to 2000 nM. The SPR data indicated that the association  
178 rate constant ( $k_a$ ) of the mAbs HK44 and HK24 with the recombinant E2 protein was  $1.70 \times$   
179  $10^4 \text{ M}^{-1} \text{ s}^{-1}$  and  $5.01 \times 10^4 \text{ M}^{-1} \text{ s}^{-1}$ , indicating a fast association constant between mAbs  
180 HK44 or HK24 and E2 protein and the equilibrium dissociation constant (KD) of  $1.85 \times 10^{-7}$   
181 M and  $3.67 \times 10^{-8}$  M respectively. These results suggest that mAbs HK44 and HK24 exhibit a

182 high binding affinity to the E2 protein. The responses of E2 protein at each concentration to  
183 mAb HK44 or HK24 are depicted as a sigmoidal dose response curve in **Fig. 4 C and 4D**.  
184 These results clearly illustrate the higher specific affinity of the mAbs HK44 and HK24 for  
185 the E2 protein.

186

### 187 **Identification of the binding of the mAbs HK24 and HK44 to a conserved epitope on the** 188 **CSFV E2 protein based on a 3D structural model**

189 To obtain detailed structural information on E2-mAbs interactions, protein-protein  
190 docking was performed. Before docking, the best protein modelling result was selected based  
191 on the probability density function (PDF) total energy and discrete optimized protein energy  
192 (DOPE). The PDF total energy and DOPE of HK24, HK44 and the E2 protein were  
193 2296.5857, -45243.882812; 2390.8101, -46726.902344; and 1949.7089, -28135.984375,  
194 respectively. Furthermore, there were fewer irrational amino acid residues in the  
195 Ramachandran Plot, suggesting that the models we built may exist. Thus, protein-protein  
196 docking was performed by setting the Fab as the receptor protein and the E2 as the ligand  
197 protein. The docking results of E2-HK24 and E2-HK44 are shown in (**Fig. 5A and 5B**). More  
198 precisely, we found that the epitope Cys141-Lys155 of the E2 motif in both cases was buried  
199 in the middle of V<sub>L</sub>-V<sub>H</sub> interface of the E2-HK24 or E2-HK44 protein complex, and this  
200 epitope contacted the Fab CDR H3, CDR L3 and CDR L1 loops in both structures in addition  
201 to CDR H2 in the HK44-E2 complex (**Fig. 5C and 5D**). In addition, the mAb HK44 also  
202 directly bind to Thr88 and Pro90 (a linear epitope on E2 protein spanning Leu84-Pro90  
203 residues that has been reported) (26, 27) by means of three residues (Val111A, Ser111B and  
204 Tyr111C) on the tip of the loop which is a relatively long CDR H3 loop (21 amino acids) (**Fig.**  
205 **5C**). As shown in **Fig. 5D**, similar to E2-HK44 protein complex, the long CDR H3 of mAb  
206 HK24 (17 amino acids) not only binds to the epitope-76, but also binds to the linear epitope  
207 on E2 protein spanning Leu84-Pro90, via some hydrogen bonds and hydrophobic interaction.  
208 Detailed interactions between antigen and antibodies are shown in the **Table 2 and 3**.

209 To further confirm the interaction between mAb HK44 or HK24 and epitope-76, Virtual  
210 Alanine Mutation Scanning (VAMS) was employed to calculate mutation energy of  
211 individual amino acid residues changes using Discovery Studio 2017. In the case of E2-HK44  
212 complex, when the residues of epitope-76 of E2 protein were individually mutated to alanine,  
213 seven residues on epitope-76, namely, Val144, Ser145, Pro146, Thr147, Arg150, Glu152,  
214 Val154 generated the mutation energy higher than 0.5 kcal/mol, indicating an unstable protein  
215 complex (**Fig. 5E**). The mutations of epitope-76 in the E2-HK24 complex procedure also  
216 destabilize the protein complex (**Fig. 5F**). When we mutate all of the epitopes to alanine, the  
217 mutation energy is 3.63 kcal/mol for E2-HK24 protein complex and 7.28 kcal/mol for  
218 E2-HK44 protein complex, indicating that the protein complex is an unstable state. In  
219 summary, these results suggested that the mAb HK24 or HK44 binds to the E2 protein by the  
220 recognition of the epitope-76 (CTAVSPTTLRTEVV).

221

### 222 **MAbs HK24 and HK44 can significantly neutralize CSFV *in vitro***

223 We next evaluated the protective efficacy of the mAbs HK24 and K44 against CSFV  
224 infection in PK-15 cells. A neutralization test was first performed via indirect  
225 immunofluorescence assay (IFA). As shown in **Fig. 6A**, the mAbs HK24 and HK44 displayed

226 high neutralizing activity against CSFV, as no fluorescence was observed at the concentration  
227 of 75 µg/ml, and only weak fluorescence signals were detected at the concentration of 1.1  
228 µg/ml, which was same as that observed for CSFV-positive serum. In contrast, strong  
229 fluorescence signals were detected in cells treated with CSFV-negative serum, indicating no  
230 inhibition of CSFV infection. The range of 50% inhibitory concentrations (IC<sub>50</sub>) to the  
231 non-neutralizing concentration for mAbs HK24 and HK44 is presented in **Fig. 6B**. These  
232 results indicated that the mAbs HK24 and HK44 exhibited neutralizing activity against CSFV,  
233 and they can prevent CSFV infections in cells.

234 To further directly detect whether the mAbs HK24 and HK44 block CSFV infection, the  
235 copy numbers of CSFV RNA in PK-15 cells were analysed via qRT-PCR with specific  
236 primers. The results suggested that treating PK-15 cells with the HK44-CSFV or  
237 HK24-CSFV complex at concentrations of 75 µg/ml to 1.1 µg/ml resulted in obviously lower  
238 numbers of virus copies in the cells than those observed with negative control treatment; at  
239 the same time, the mAb HK44 showed better neutralization activity than the mAb HK24 (**Fig.**  
240 **6C and 6D**).

241 In summary, these data indicated that the mAbs HK24 and HK44 significantly  
242 neutralized CSFV and played an essential role in preventing CSFV from infecting target  
243 cells.

244

## 245 **Discussion**

246 CSF is a disease that threatens the pork industry and has caused tremendous economic  
247 losses. As an alternative, development of effective vaccines and therapeutics agents may be a  
248 direct and effective approach to minimizing these losses. With the technological advances,  
249 mAbs now represent an important class of biotherapeutics, which can be used to treat  
250 autoimmune disorders diseases, cancer and viral or bacterial infections (28). Thus, it is  
251 necessary to establish a simple, highly efficient, low-cost method to produce anti-CSFV  
252 NAbs.

253 For generation of human mAbs, there have been previous reports of approaches  
254 involving the sorting of single B cells via FACS using fluorescently-labelled specific  
255 membrane immunoglobulins as antigen bait; However, this method may be limited by the  
256 number of antigenic baiting reagents (29-31). Here, we describe a method for efficient  
257 production of mAbs from immunized swine. We used a fluoresceinated linear neutralizing  
258 epitope CTAVSPTTLRTEVVK and FITC-labelled goat anti-pig IgG as bait for flow  
259 cytometry to screen B cells from a pig that had been pre-screened for high-level  
260 CSFV-specific antibody response in the blood. The cognate immunoglobulin heavy- and  
261 light-chain genes were then isolated from epitope-specific single B cells using single-cell  
262 RT-PCR technology. The key features of this method are the (a) sorting of B cells using a  
263 specific linear epitope by FACS, which may avoid the limitation of the availability of multiple  
264 antigenic baiting reagents; (b) direct isolation of natively matched full-length heavy- and  
265 light-chain pairs from a single B cell, thus, producing natural mAbs with a lower the risk of  
266 immunogenicity *in vivo* and greater suitability for *in vivo* applications; (c) rescue of mAbs  
267 that recognize the specific linear epitope. In contrast to traditional methods for generating  
268 mAbs, such as hybridoma technology, Epstein-Barr virus-transformation and phage-display  
269 libraries, this method helps to improve the recovery efficiency of mAbs as 78% of the mAbs



270 produced showed neutralizing activity against CSFV. Taken together, this method is more  
271 convenient and efficient for obtaining epitope-specific NAbs against CSFV.

272 In this study, we amplified full-length heavy- and light-chain genes from one hundred  
273 single B cells and obtained nine mAbs, among which three were identical to HK24 and four  
274 to HK44. Thus, two mAbs HK24 and HK44 were selected to detect the strong binding  
275 reactivity against CSFV via Western blotting. To further define their binding paratopes, we  
276 tested the reactivity of the mAbs HK24 and HK44 with recombinant E2 via indirect ELISA  
277 and SPR. The results showed that the mAbs HK24 and HK44 exhibited comparable reactivity  
278 to the E2 protein. The binding sites within the linear epitope CTAVSPTTLRTEVVK on the  
279 E2 protein surface were predicted through a 3D structural model. Notably, these results are  
280 consistent with reports that the linear epitope CTAVSPTTLRTEVVK on the E2 protein is  
281 specifically recognized by CSFV antibodies (23, 32). Because the linear epitope is conserved  
282 in diverse CSFV strains and is divergent in the BVDV and BDV strains, we deduced that the  
283 mAbs HK44 and HK24 might be applied for the development of diagnostic reagents for  
284 CSFV.

285 We also confirmed that the mAbs HK24 and HK44 exhibited a powerful neutralizing  
286 response against the CSFV Shimen strain *in vitro*; in particular, the mAb HK44 showed an  
287  $IC_{50} \leq 1.1 \mu\text{g/ml}$  (**Fig. 6B**). This result indicated that these mAbs are capable of blocking virus  
288 infection and provided implications for therapeutic designs. Moreover, neutralization assays  
289 showed that in this work, the mAb HK44 exhibited more excellent neutralizing activity than  
290 the mAb HK24. We deduced that this may be due to a longer CDR H3 (21 amino acids)  
291 because the amino acid lengths of the predominant CDR H3 are conserved in most vertebrates,  
292 averaging 12-16 amino acids (33). Indeed, some longer CDR H3 loops usually play an  
293 important role in the adaptive immune response such as virus neutralization as described  
294 previously (34-36). Elongated CDR H3 can better overcome the structural barriers presented  
295 by antigens to confer protective functions.

296 In conclusion, this is the first report to describe the isolation of whole-porcine NAbs  
297 against the E2 protein of CSFV from single B cells of a vaccinated pig using a specific linear  
298 epitope. In this study, we characterized the functions of the mAbs HK24 and HK44 through a  
299 panel of assays. The results demonstrated that HK24 and HK44 displayed high sensitivity to  
300 CSFV, indicating that these mAbs have great potential for the detection and treatment of viral  
301 infections. In addition, we established a simple and rapid method for the isolation of specific  
302 B cells. The mAbs that we generated were derived directly from porcine B cells and are  
303 therefore safer and more efficient than mAbs produced in mice, rabbits or other species.

304

## 305 **Materials and methods**

### 306 **Cell lines and virus**

307 PK-15 cells (porcine kidney cell line, ATCC, CCL-33) and HEK293T cells (human  
308 embryonic kidney cell line, ATCC, Manassas, VA) were cultured in Dulbecco's minimal  
309 essential medium (DMEM, Gibco, America) supplemented with 10% heat-inactivated foetal  
310 bovine serum (FBS, Gibco, America), at 37 °C in 5% CO<sub>2</sub>. CSFV (strain Shimen) was gifts  
311 from Dr. Changchun Tu (Academy of Military Medical Sciences, Changchun, China).

312

### 313 **Single B cell sorting**

314 Blood samples were isolated from a swine with a high-level CSFV-specific antibody  
315 response that received primary immunization with an attenuated vaccine strain of CSFV and  
316 subsequent boosting two times at one-week intervals with the same vaccine. Peripheral blood  
317 mononuclear cells (PBMCs) were isolated and suspended in phosphate-buffered saline (PBS).  
318 cells were stained for 30 min at 4 °C using FITC-labelled goat anti-pig IgG (Sigma-Aldrich,  
319 USA) and 5-TAMRA-conjugated epitope-76, which is a conserved epitope  
320 (CTAVSPTTLRTEVVK) on the E2 protein of CSFV (synthesized by China Peptides Co., Ltd.,  
321 China) (37). All buffers used for staining contained 2% FBS (vol/vol) to block non-specific  
322 binding. Single cells were sorted via flow cytometry into 0.2-ml thin-walled PCR tubes  
323 containing 20 µl of cell lysis buffer supplemented with 1 µl of RNase inhibitor, 19 µl of 0.2%  
324 (vol/vol) Triton X-100 (Sigma-Aldrich, USA), 1 µl of oligo-dT primer and 1 µl of dNTP mix.  
325 The cells were stored at -80 °C until use (38, 39).

326

### 327 **Isolation and expression of Ig gene**

328 PCR was performed to amplify the full-length immunoglobulin heavy- and light-chain  
329 genes (*IgH* and *IgL*) from single B cells as described previously (40, 41). Briefly, to obtain Ig  
330 genes, we performed a reverse transcription reaction using SuperScript II reverse transcriptase  
331 (38, 42). Next, the *IgH*, *Igλ* and *Igκ* genes were amplified separately via nested PCR reactions  
332 using a mixture of primers that were specific for heavy chain, kappa light chain and lambda  
333 light chain; all oligonucleotide primers are listed in **Table 1**. The PCR products of the  
334 full-length heavy- and light-chain genes were confirmed via sequencing and were separately  
335 cloned into the pEGFP-C1 expression vector with the EF1α promoter and WPRE element  
336 (**Fig. S1**). To produce mAbs, plasmids encoding immunoglobulin heavy- and light-chains  
337 were transiently co-transfected into HEK293T cells using PowerTrans293 Transfection  
338 Reagent (Throne Science, Shanghai, China) following the manufacturer's instructions. After  
339 culturing for four days at 37 °C under 5% CO<sub>2</sub> in 6-well plates, supernatants were harvested  
340 via centrifugation, and antibodies were purified using Protein A (GenScript, USA Inc.) and  
341 quantified using a NanoDrop 2000.

342

### 343 **SDS-polyacrylamide gel electrophoresis (SDS-PAGE) and Western blotting analysis**

344 SDS-PAGE was performed as follows. Briefly, antibody samples were separated in 12%  
345 (reducing conditions) resolving gels and 4% stacking gels, and protein bands were stained  
346 using Coomassie brilliant blue R-250 (43). For Western blotting analysis, we collected  
347 CSFV-infected cells and uninfected cells separately in cold PBS and lysed them using a lysis  
348 buffer (Beyotime, China) that contained 1 mM phenylmethylsulfonyl fluoride (PMSF) for 5  
349 min on ice. After centrifugation at 10,000 × g at 4 °C for 10 min, the supernatants were  
350 harvested and transferred into new 1.5-ml centrifuge tubes (44). Protein concentrations were  
351 determined with an enhanced-bicinchoninic acid (BCA) protein assay kit (Beyotime, China).

352 Western blotting was performed according to a previously described procedure (45).  
353 Briefly, equal amounts of proteins were loaded on a 12% SDS-PAGE gel. Next, the separated  
354 proteins were transferred onto nitrocellulose membranes, which were blocked with 5%  
355 (wt/vol) non-fat milk in Tris-buffered saline that contained 0.2-0.4% Tween-20 (TBS-T) for 2  
356 h at room temperature. The membranes were probed with 4 µg/ml mAb or porcine IgGs  
357 (hyperimmune serum). Next, the bound antibody was stained using 2 µg/ml horseradish

358 peroxidase (HRP)-conjugated rabbit anti-pig antibodies (Beijing Biosynthesis Biotechnology  
359 Co. Ltd, China). Immunoreactive bands were visualized using the ECL detection reagent  
360 (Beyotime, China) and the Azure c600 Western blot imaging system.

361

### 362 **Immunofluorescence to detect the binding specificity of mAbs HK44 and HK24 to** 363 **epitope-76**

364 The binding of epitope-76 to mAbs HK44 and HK24 were determined via  
365 immunofluorescence. In this procedure, enzyme-linked immunosorbent assay (ELISA) plates  
366 were coated with 100  $\mu$ l (2  $\mu$ g/ml) of a positive polyclonal antibody, mAbs HK24 and HK44  
367 diluted in carbonate bicarbonate buffer (pH 9.6) and were incubated at 4  $^{\circ}$ C overnight (46).  
368 The next day, the plates were washed thrice with PBS containing 0.05% Tween-20 (PBS-T),  
369 and 100  $\mu$ l of blocking buffer (5% non-fat dry milk in PBS) was added per well. The plates  
370 were incubated at 37  $^{\circ}$ C for 1 h. After blocking, 100  $\mu$ l of FITC-conjugated epitope-76 or  
371 unrelated FITC-conjugated epitope-75 was added into each well, and the plates were  
372 incubated at 37  $^{\circ}$ C for 2 h. Finally, fluorescence intensity was measured using a Tecan  
373 Microplate reader.

374

### 375 **Expression of the E2 protein**

376 The partial sequence of E2 gene (GenBank: AY775178.2) was amplified from  
377 CSFV-infected cell mRNA via PCR and cloned into an expression vector (47). The vector was  
378 transformed into *E. coli* Rosetta (DE3) cells, and the transformants were selected and cultured  
379 in LB. The overnight cultures were subcultured at 1:100 and grown to an OD<sub>600</sub> of 0.6 at 37  $^{\circ}$ C.  
380 Next, 0.1 mM isopropyl-b-D-thiogalactopyranoside (IPTG) was added to induce the  
381 expression of the protein at 25  $^{\circ}$ C for 12 h. The induced culture was harvested via  
382 centrifugation at 6,500  $\times$  g for 15 min at 4  $^{\circ}$ C and sonicated on ice. Subsequently, the inclusion  
383 bodies were separated from the crude cell lysate via centrifugation at 10,000  $\times$  g for 10 min  
384 and dissolved in 6 M urea at room temperature for 6 h. Finally, soluble E2 protein was  
385 purified through Ni-NTA resin as described previously (48, 49).

386

### 387 **Detecting the affinity of mAbs HK24 and HK44 for the CSFV E2 protein via indirect** 388 **ELISA**

389 An indirect ELISA was used to determine the affinity of the mAbs for the CSFV E2  
390 protein. Purified E2 protein (2  $\mu$ g/ml) was used to coat ELISA plates at 4  $^{\circ}$ C overnight. The  
391 next day, the plates were washed thrice with PBS-T, and 100  $\mu$ l of blocking buffer (5% nonfat  
392 dry milk in PBS) was added per well. The plates were incubated at 37  $^{\circ}$ C for 1 h. After  
393 blocking, 100  $\mu$ l of antibody samples were added per well, and the plates were incubated at  
394 37  $^{\circ}$ C for 2 h. Thereafter, an HRP-conjugated rabbit anti-pig antibody (Beijing Biosynthesis  
395 Biotechnology Co. Ltd, China) was added into each well at 37  $^{\circ}$ C for 1 h. Finally, the wells  
396 were washed and incubated with 100  $\mu$ l of TMB/H<sub>2</sub>O<sub>2</sub> substrate per well at room temperature  
397 for 10 min. The reaction was stopped using 50  $\mu$ l of 2 M H<sub>2</sub>SO<sub>4</sub> per well, and the absorbance  
398 was read at 450 nm.

399

### 400 **Modelling of the E2 protein and the antigen-binding (Fab) fragment of the mAbs HK24** 401 **and HK44**

402 The interactions of mAbs HK24 and HK44 with the CSFV E2 protein were simulated  
403 using Discovery Studio 2017. To obtain a three-dimensional model of the mAb HK24, we  
404 searched for a similar sequence in the Protein Data Bank (PDB) database. We found that the  
405 sequence homology between an anti-G-quadruplex-containing RNA antibody crystal (PDB  
406 4KZD) and Fab of HK24 consisted of 84.1% similarity and 72.7% identity. Therefore, we  
407 used PDB 4KZD as a template for modelling the mAb HK24 Fab. Considering the quality of  
408 mAb HK44 model, we selected a chimeric template for modelling. For this purpose,  
409 humanized antibody 4B12 Fab (PDB 4LKX), an anti-TDRD3 FAB (PDB 3PNW) and an  
410 anti-CMV Fab Fragment (PDB 4LRI) were used as templates for modelling the light chain  
411 (LC), heavy chain (HC) and the interface of the mAb HK44 Fab; the sequence homologies  
412 (similarity and identity) between each template and the mAb HK44 Fab were 87.7% and 74.9%  
413 for V<sub>L</sub>, 80.4% and 70.9% for V<sub>H</sub> and 82.8% and 69.8% for the entire Fab, respectively. E2  
414 protein modelling was performed using the template of the crystal of the BVDV1 envelope  
415 glycoprotein E2 (PDB 2YQ2, 60% sequence identity with E2) (50).

416

### 417 **Docking and analysis of protein complexes**

418 Before docking, models were typed using the CHARMM Polar H forcefield. We set E2  
419 as the ligand protein and the Fab of HK24/HK44 as the receptor protein. ZDOCK, a  
420 rigid-body protein-protein docking algorithm based on the Fast Fourier Transform Correlation  
421 technique, was used with a 6° angular step size to generate 54,000 poses, of which the top  
422 2000 were re-ranked by ZRANK (51). These poses were then processed with RDOCK, and  
423 only the top 10 clusters with the highest density of poses were further considered. Finally, we  
424 used the “Analyze Protein Interface” protocol for analysis. All docking calculations were  
425 performed using Discovery Studio 2017.

426

### 427 **Surface plasmon resonance (SPR) analysis**

428 To analyse the affinity of the mAbs for the CSFV E2 protein, we performed SPR analysis  
429 on a Biacore 8K system (GE Healthcare) using CM5 sensor chips (GE Healthcare) and PBS-T  
430 as the running buffer during immobilization and binding analysis at a constant temperature of  
431 25 °C (52). Initially, the surface was activated with  
432 1-ethyl-3-(3-dimethylaminopropyl)-carbodiimide (EDC) and N-hydroxysuccinimide (NHS),  
433 and the mAb HK44 or HK24 was diluted in 10 mM sodium acetate buffer (pH 4.0) and  
434 immobilized on the CM5 sensor chip using Amine Coupling Kit (GE Healthcare). Next, for  
435 binding analysis, five different concentrations of the recombinant E2 protein diluted in the  
436 running buffer (2000 nM, 1000 nM, 500 nM, 250 nM, and 125 nM) were allowed to flow  
437 over the chip surface. After sample injection was completed, the running buffer was allowed  
438 to flow over the surface to perform dissociation. At the end of dissociation, the sensor surface  
439 was regenerated with a glycine-HCl solution (53). Finally, all experimental data were  
440 analysed using Biacore 8K evaluation software (GE Healthcare).

441

### 442 **Neutralization assays**

443 The neutralization activity of the mAbs HK24 and HK44 against CSFV was tested via an  
444 immunofluorescence assay as described previously (54). Briefly, PK-15 cells were grown to  
445 30-40% confluence in complete DMEM containing 10% FBS on 96-well plates at 37 °C in 5%

446 CO<sub>2</sub>. Antibodies (150 µg/ml) were diluted two-fold in DMEM in a series and mixed 1:1 with  
447 100 TCID<sub>50</sub> CSFV, and the mixtures were incubated at 37 °C for 1 h. After incubation, 100 µl  
448 of the antibody-virus mixture was added into the wells of the 96-well plates to infect the  
449 PK-15 cells for 2 h. Uninfected cells and virus-infected cells acted as positive and negative  
450 controls, respectively. After 2 h of incubation, the supernatants were aspirated, and the cells  
451 were washed three times with PBS. Next, 200 µl of fresh medium was added, and the cells  
452 were incubated at 37 °C for 72 h. Subsequently, the cells were fixed with 80% cold acetone at  
453 -20 °C overnight. The next day, the cells were washed and incubated with porcine  
454 CSFV-positive serum (1:100 dilution in PBS containing 10% FBS) at 37 °C for 2 h. After  
455 being washed three times with PBS, FITC-labelled goat anti-pig IgG (Sigma-Aldrich,  
456 America) was added into each well, and the plates were incubated at 37 °C for 0.5 h (55).  
457 Images were obtained using fluorescence microscopy (Olympus BX51).

458

### 459 **Quantification of CSFV RNA**

460 Quantitative RT-PCR (qRT-PCR) was performed to examine CSFV in PK-15 cells. Total  
461 RNA was extracted from the uninfected and virus-infected cells using TRIzol (Tiangen,  
462 Beijing, China), according to the manufacturer's instructions. Reverse transcription reactions  
463 were performed using the FastKing RT Kit (Tiangen, Beijing, China) to synthesize cDNA, and  
464 qRT-PCR was performed on a Bio-RadiQ5 instrument (BioRad, USA) with SuperReal  
465 PreMix Plus (Tiangen, Beijing, China). A standard curve was simultaneously created to  
466 calculate the viral load in each sample.

467

### 468 **Statistical analysis**

469 All data presented in the figures are expressed as the mean ± SD from at least three  
470 independent experiments. When the data from the neutralization assays were analysed, the  
471 antibody concentrations were transformed to log<sub>10</sub>, and the IC<sub>50</sub> was calculated using  
472 GraphPad Prism software 7.0 (La Jolla, CA, America) with the equation for dose response  
473 (variable slope). P < 0.05 was considered statistically significant.

474

### 475 **Acknowledgements**

476 We would like to thank Xue Chen for technical assistance. This study was financially  
477 supported by a grant from the Special Funds for Cultivation and Breeding of New Transgenic  
478 Organisms (No. 2016ZX08006003), the Program for JLU Science and Technology Innovative  
479 Research Team (2017TD-28), the Program for Changjiang Scholars and Innovative Research  
480 Team in University in China (No. IRT16R32), the Fundamental Research Funds for the  
481 central Universities, the Jilin Province Science and Technology Development Projects (No.  
482 20150204077NY) and the National Natural Science Foundation of China (No. 31772747).

483

### 484 **Conflict of Interest**

485 The authors declare that they have no competing interests.

486

### 487 **Ethical Approval**

488 Not applicable.

489

## 490 **References**

- 491 1. **Tamura T, Nagashima N, Ruggli N, Summerfield A, Kida H, Sakoda Y.** 2014. Npro of classical swine  
492 fever virus contributes to pathogenicity in pigs by preventing type I interferon induction at local  
493 replication sites. *Veterinary research* **45**:47.
- 494 2. **Lamp B, Riedel C, Roman-Sosa G, Heimann M, Jacobi S, Becher P, Thiel HJ, Rumenapf T.** 2011.  
495 Biosynthesis of classical swine fever virus nonstructural proteins. *J Virol* **85**:3607-3620.
- 496 3. **Chandriani S, Skewes-Cox P, Zhong W, Ganem DE, Divers TJ, Van Blaricum AJ, Tennant BC, Kistler AL.**  
497 2013. Identification of a previously undescribed divergent virus from the Flaviviridae family in an  
498 outbreak of equine serum hepatitis. *Proceedings of the National Academy of Sciences of the United*  
499 *States of America* **110**:E1407-1415.
- 500 4. **Becher P, Avalos Ramirez R, Orlich M, Cedillo Rosales S, König M, Schweizer M, Stalder H, Schirrneier**  
501 **H, Thiel H-J.** 2003. Genetic and antigenic characterization of novel pestivirus genotypes: implications  
502 for classification. *Virology* **311**:96-104.
- 503 5. **Meyers G, Thiel HJ.** 1996. Molecular characterization of pestiviruses. *Advances in virus research*  
504 **47**:53-118.
- 505 6. **Wang Z, Nie Y, Wang P, Ding M, Deng H.** 2004. Characterization of classical swine fever virus entry by  
506 using pseudotyped viruses: E1 and E2 are sufficient to mediate viral entry. *Virology* **330**:332-341.
- 507 7. **Risatti GR, Borca MV, Kutish GF, Lu Z, Holinka LG, French RA, Tulman ER, Rock DL.** 2005. The E2  
508 glycoprotein of classical swine fever virus is a virulence determinant in swine. *J Virol* **79**:3787-3796.
- 509 8. **Edwards S, Sands JJ.** 1990. Antigenic comparisons of hog cholera virus isolates from Europe, America  
510 and Asia using monoclonal antibodies. *DTW. Deutsche tierärztliche Wochenschrift* **97**:79-81.
- 511 9. **Yu M, Wang LF, Shiell BJ, Morrissy CJ, Westbury HA.** 1996. Fine mapping of a C-terminal linear epitope  
512 highly conserved among the major envelope glycoprotein E2 (gp51 to gp54) of different pestiviruses.  
513 *Virology* **222**:289-292.
- 514 10. **Burton DR, Hangartner L.** 2016. Broadly Neutralizing Antibodies to HIV and Their Role in Vaccine  
515 Design. *Annu Rev Immunol* **34**:635-659.
- 516 11. **Pasqualini R, Arap W.** 2004. Hybridoma-free generation of monoclonal antibodies. *Proceedings of the*  
517 *National Academy of Sciences of the United States of America* **101**:257-259.
- 518 12. **Cole SP, Campling BG, Atlaw T, Kozbor D, Roder JC.** 1984. Human monoclonal antibodies. *Molecular*  
519 *and cellular biochemistry* **62**:109-120.
- 520 13. **Reichert JM, Rosensweig CJ, Faden LB, Dewitz MC.** 2005. Monoclonal antibody successes in the clinic.  
521 *Nature biotechnology* **23**:1073-1078.
- 522 14. **Kohler G, Milstein C.** 2005. Continuous cultures of fused cells secreting antibody of predefined  
523 specificity. 1975. *Journal of immunology* **174**:2453-2455.
- 524 15. **Burton DR, Barbas CF, 3rd, Persson MA, Koenig S, Chanock RM, Lerner RA.** 1991. A large array of  
525 human monoclonal antibodies to type 1 human immunodeficiency virus from combinatorial libraries  
526 of asymptomatic seropositive individuals. *Proceedings of the National Academy of Sciences of the*  
527 *United States of America* **88**:10134-10137.
- 528 16. **Wilson PC, Andrews SF.** 2012. Tools to therapeutically harness the human antibody response. *Nature*  
529 *reviews. Immunology* **12**:709-719.
- 530 17. **Sun Z, Yan L, Tang J, Qian Q, Lenberg J, Zhu D, Liu W, Wu K, Wang Y, Lu S.** 2018. Brief introduction of  
531 current technologies in isolation of broadly neutralizing HIV-1 antibodies. *Virus Res* **243**:75-82.
- 532 18. **Bornholdt ZA, Turner HL, Murin CD, Li W, Sok D, Souders CA, Piper AE, Goff A, Shamblin JD, Wollen**  
533 **SE, Sprague TR, Fusco ML, Pommert KBJ, Cavacini LA, Smith HL, Klempner M, Reimann KA, Krauland**

- 534 **E, Gerngross TU, Wittrup KD, Saphire EO, Burton DR, Glass PJ, Ward AB, Walker LM.** 2016. Isolation of  
535 potent neutralizing antibodies from a survivor of the 2014 Ebola virus outbreak. *Science*  
536 **351**:1078-1083.
- 537 19. **Sok D, Le KM, Vadnais M, Saye-Francisco KL, Jardine JG, Torres JL, Berndsen ZT, Kong L, Stanfield R,**  
538 **Ruiz J, Ramos A, Liang CH, Chen PL, Criscitiello MF, Mwangi W, Wilson IA, Ward AB, Smider VV,**  
539 **Burton DR.** 2017. Rapid elicitation of broadly neutralizing antibodies to HIV by immunization in cows.  
540 *Nature* **548**:108-111.
- 541 20. **Robbiani DF, Bozzacco L, Keeffe JR, Khouri R, Olsen PC, Gazumyan A, Schaefer-Babajew D, Avila-Rios**  
542 **S, Nogueira L, Patel R, Azzopardi SA, Uhl LFK, Saeed M, Sevilla-Reyes EE, Agudelo M, Yao KH,**  
543 **Golijanin J, Gristick HB, Lee YE, Hurley A, Caskey M, Pai J, Oliveira T, Wunder EA, Jr., Sacramento G,**  
544 **Nery N, Jr., Orge C, Costa F, Reis MG, Thomas NM, Eisenreich T, Weinberger DM, de Almeida ARP,**  
545 **West AP, Jr., Rice CM, Bjorkman PJ, Reyes-Teran G, Ko AI, MacDonald MR, Nussenzweig MC.** 2017.  
546 Recurrent Potent Human Neutralizing Antibodies to Zika Virus in Brazil and Mexico. *Cell* **169**:597-609  
547 e511.
- 548 21. **Labrijn AF, Poignard P, Raja A, Zwick MB, Delgado K, Franti M, Binley J, Vivona V, Grundner C, Huang**  
549 **CC, Venturi M, Petropoulos CJ, Wrin T, Dimitrov DS, Robinson J, Kwong PD, Wyatt RT, Sodroski J,**  
550 **Burton DR.** 2003. Access of antibody molecules to the conserved coreceptor binding site on  
551 glycoprotein gp120 is sterically restricted on primary human immunodeficiency virus type 1. *J Virol*  
552 **77**:10557-10565.
- 553 22. **Chen SC, Li S, Sun HM, Li YF, Ji SW, Song K, Zhang LK, Luo YZ, Sun Y, Ma JF, Liu PH, Qiu HJ.** 2018.  
554 Expression and characterization of a recombinant porcine antibody against the E2 protein of  
555 classical swine fever virus. *Appl Microbiol Biot* **102**:961-970.
- 556 23. **Qi Y, Liu LC, Zhang BQ, Shen Z, Wang J, Chen YH.** 2008. Characterization of antibody responses against  
557 a neutralizing epitope on the glycoprotein E2 of classical swine fever virus. *Arch Virol* **153**:1593-1598.
- 558 24. **Viitala T, Granqvist N, Hallila S, Ravina M, Yliperttula M.** 2013. Elucidating the Signal Responses of  
559 Multi-Parametric Surface Plasmon Resonance Living Cell Sensing: A Comparison between Optical  
560 Modeling and Drug-MDCKII Cell Interaction Measurements. *PloS one* **8**.
- 561 25. **De Crescenzo G, Boucher C, Durocher Y, Jolicœur M.** 2008. Kinetic Characterization by Surface  
562 Plasmon Resonance-Based Biosensors: Principle and Emerging Trends. *Cell Mol Bioeng* **1**:204-215.
- 563 26. **Peng WP, Hou Q, Xia ZH, Chen D, Li N, Sun Y, Qiu HJ.** 2008. Identification of a conserved linear B-cell  
564 epitope at the N-terminus of the E2 glycoprotein of Classical swine fever virus by phage-displayed  
565 random peptide library. *Virus Res* **135**:267-272.
- 566 27. **El Omari K, Iourin O, Harlos K, Grimes JM, Stuart DI.** 2013. Structure of a Pestivirus Envelope  
567 Glycoprotein E2 Clarifies Its Role in Cell Entry. *Cell reports* **3**:30-35.
- 568 28. **Chadd HE, Chamow SM.** 2001. Therapeutic antibody expression technology. *Curr Opin Biotech*  
569 **12**:188-194.
- 570 29. **Magnani DM, Rogers TF, Beutler N, Ricciardi MJ, Bailey VK, Gonzalez-Nieto L, Briney B, Sok D, Le K,**  
571 **Strubel A, Gutman MJ, Pedreno-Lopez N, Grubaugh ND, Silveira CGT, Maxwell HS, Domingues A,**  
572 **Martins MA, Lee DE, Okwuazi EE, Jean S, Strobert EA, Chahroudi A, Silvestri G, Vanderford TH, Kallas**  
573 **EG, Desrosiers RC, Bonaldo MC, Whitehead SS, Burton DR, Watkins DI.** 2017. Neutralizing human  
574 monoclonal antibodies prevent Zika virus infection in macaques. *Sci Transl Med* **9**.
- 575 30. **Huang J, Doria-Rose NA, Longo NS, Laub L, Lin CL, Turk E, Kang BH, Migueles SA, Bailer RT, Mascola**  
576 **JR, Connors M.** 2013. Isolation of human monoclonal antibodies from peripheral blood B cells. *Nature*  
577 *protocols* **8**:1907-1915.

- 578 31. **Wardemann H, Yurasov S, Schaefer A, Young JW, Meffre E, Nussenzweig MC.** 2003. Predominant  
579 autoantibody production by early human B cell precursors. *Science* **301**:1374-1377.
- 580 32. **van der Wal FJ, Jelsma T, Fijten H, Achterberg RP, Loeffen WL.** 2016. Towards a peptide-based  
581 suspension array for the detection of pestivirus antibodies in swine. *Journal of virological methods*  
582 **235**:15-20.
- 583 33. **Wang F, Ekiert DC, Ahmad I, Yu W, Zhang Y, Bazirgan O, Torkamani A, Raudsepp T, Mwangi W,**  
584 **Criscitiello MF, Wilson IA, Schultz PG, Smider VV.** 2013. Reshaping antibody diversity. *Cell*  
585 **153**:1379-1393.
- 586 34. **Collis AVJ, Brouwer AP, Martin ACR.** 2003. Analysis of the Antigen Combining Site: Correlations  
587 Between Length and Sequence Composition of the Hypervariable Loops and the Nature of the Antigen.  
588 *Journal of molecular biology* **325**:337-354.
- 589 35. **Kodangattil S, Huard C, Ross C, Li J, Gao H, Mascioni A, Hodawadekar S, Naik S, Min-debartolo J,**  
590 **Visintin A, Almagro JC.** 2014. The functional repertoire of rabbit antibodies and antibody discovery via  
591 next-generation sequencing. *mAbs* **6**:628-636.
- 592 36. **Pejchal R, Walker LM, Stanfield RL, Phogat SK, Koff WC, Poignard P, Burton DR, Wilson IA.** 2010.  
593 Structure and function of broadly reactive antibody PG16 reveal an H3 subdomain that mediates  
594 potent neutralization of HIV-1. *Proceedings of the National Academy of Sciences of the United States*  
595 *of America* **107**:11483-11488.
- 596 37. **Carbonetti S, Oliver BG, Vigdorovich V, Dambrauskas N, Sack B, Bergl E, Kappe SHI, Sather DN.** 2017.  
597 A method for the isolation and characterization of functional murine monoclonal antibodies by single B  
598 cell cloning. *Journal of immunological methods* **448**:66-73.
- 599 38. **Picelli S, Faridani OR, Bjorklund AK, Winberg G, Sagasser S, Sandberg R.** 2014. Full-length RNA-seq  
600 from single cells using Smart-seq2. *Nature protocols* **9**:171-181.
- 601 39. **Bornholdt ZA, Turner HL, Murin CD, Li W, Sok D, Souders CA, Piper AE, Goff A, Shamblin JD, Wollen**  
602 **SE, Sprague TR, Fusco ML, Pommert KB, Cavacini LA, Smith HL, Klempner M, Reimann KA, Krauland E,**  
603 **Gerngross TU, Wittrup KD, Saphire EO, Burton DR, Glass PJ, Ward AB, Walker LM.** 2016. Isolation of  
604 potent neutralizing antibodies from a survivor of the 2014 Ebola virus outbreak. *Science*  
605 **351**:1078-1083.
- 606 40. **Tiller T, Meffre E, Yurasov S, Tsuiji M, Nussenzweig MC, Wardemann H.** 2008. Efficient generation of  
607 monoclonal antibodies from single human B cells by single cell RT-PCR and expression vector cloning.  
608 *Journal of immunological methods* **329**:112-124.
- 609 41. **Liao HX, Bonsignori M, Alam SM, McLellan JS, Tomaras GD, Moody MA, Kozink DM, Hwang KK, Chen**  
610 **X, Tsao CY, Liu PH, Lu XZ, Parks RJ, Montefiori DC, Ferrari G, Pollara J, Rao M, Peachman KK, Santra S,**  
611 **Letvin NL, Karasavvas N, Yang ZY, Dai KF, Pancera M, Gorman J, Wiehe K, Nicely NI, Rerks-Ngarm S,**  
612 **Nitayaphan S, Kaewkungwal J, Pitisuttithum P, Tartaglia J, Sinangil F, Kim JH, Michael NL, Kepler TB,**  
613 **Kwong PD, Mascola JR, Nabel GJ, Pinter A, Zolla-Pazner S, Haynes BF.** 2013. Vaccine Induction of  
614 Antibodies against a Structurally Heterogeneous Site of Immune Pressure within HIV-1 Envelope  
615 Protein Variable Regions 1 and 2. *Immunity* **38**:176-186.
- 616 42. **Picelli S, Bjorklund AK, Faridani OR, Sagasser S, Winberg G, Sandberg R.** 2013. Smart-seq2 for  
617 sensitive full-length transcriptome profiling in single cells. *Nature methods* **10**:1096-1098.
- 618 43. **Giritch A, Marillonnet S, Engler C, van Eldik G, Botterman J, Klimyuk V, Gleba Y.** 2006. Rapid high-yield  
619 expression of full-size IgG antibodies in plants coinfecting with noncompeting viral vectors. *Proceedings*  
620 *of the National Academy of Sciences of the United States of America* **103**:14701-14706.
- 621 44. **Luo L, Nishi K, Macleod E, Sabara MI, Lin M, Handel K, Pasick J.** 2013. Baculovirus expression and



- 622 antigenic characterization of classical swine fever virus E2 proteins. *Transboundary and emerging*  
623 *diseases* **60**:143-151.
- 624 45. **Gershoni JM, Palade GE.** 1982. Electrophoretic transfer of proteins from sodium dodecyl  
625 sulfate-polyacrylamide gels to a positively charged membrane filter. *Analytical biochemistry*  
626 **124**:396-405.
- 627 46. **Tarradas J, Monso M, Munoz M, Rosell R, Fraile L, Frias MT, Domingo M, Andreu D, Sobrino F, Ganges**  
628 **L.** 2011. Partial protection against classical swine fever virus elicited by dendrimeric vaccine-candidate  
629 peptides in domestic pigs. *Vaccine* **29**:4422-4429.
- 630 47. **Ficinska J, Szymanski P, Szewczyk B, Bienkowska-Szewczyk K.** 1999. Expression of CSFV E2  
631 glycoprotein gene in baculovirus system. *Med Weter* **55**:677-680.
- 632 48. **Goto M, Hashimoto Y, Fujita T, Ono T, Furusaki S.** 2000. Important parameters affecting efficiency of  
633 protein refolding by reversed micelles. *Biotechnol Progr* **16**:1079-1085.
- 634 49. **Risatti GR, Holinka LG, Carrillo C, Kutish GF, Lu Z, Tulman ER, Sainz IF, Borca MV.** 2006. Identification  
635 of a novel virulence determinant within the E2 structural glycoprotein of classical swine fever virus.  
636 *Virology* **355**:94-101.
- 637 50. **Grellier B, Le Pogam F, Vitorino M, Starck JP, Geist M, Duong V, Haegel H, Menguy T, Bonnefoy JY,**  
638 **Marchand JB, Ancian P.** 2014. 3D modeling and characterization of the human CD115 monoclonal  
639 antibody H27K15 epitope and design of a chimeric CD115 target. *mAbs* **6**:533-546.
- 640 51. **Pierce B, Weng ZP.** 2007. ZRANK: Reranking protein docking predictions with an optimized energy  
641 function. *Proteins* **67**:1078-1086.
- 642 52. **Della Pia EA, Martinez KL.** 2015. Single Domain Antibodies as a Powerful Tool for High Quality Surface  
643 Plasmon Resonance Studies. *PLoS one* **10**.
- 644 53. **Sandomenico A, Leonardi A, Berisio R, Sanguigno L, Foca G, Foca A, Ruggiero A, Doti N, Muscariello L,**  
645 **Barone D, Farina C, Owsianka A, Vitagliano L, Patel AH, Ruvo M.** 2016. Generation and  
646 Characterization of Monoclonal Antibodies against a Cyclic Variant of Hepatitis C Virus E2 Epitope  
647 412-422. *J Virol* **90**:3745-3759.
- 648 54. **Fu F, Li L, Shan L, Yang B, Shi H, Zhang J, Wang H, Feng L, Liu P.** 2017. A spike-specific whole-porcine  
649 antibody isolated from a porcine B cell that neutralizes both genogroup 1 and 2 PEDV strains.  
650 *Veterinary microbiology* **205**:99-105.
- 651 55. **Xie Z, Pang D, Wang K, Li M, Guo N, Yuan H, Li J, Zou X, Jiao H, Ouyang H, Li Z, Tang X.** 2017.  
652 Optimization of a CRISPR/Cas9-mediated Knock-in Strategy at the Porcine Rosa26 Locus in Porcine  
653 Foetal Fibroblasts. *Sci Rep* **7**:3036.

654

655

## 656 **Figure legends**

657

### 658 **Figure 1. Isolation of epitope-specific antibodies.**

659 (A and B) Detection of CSFV antibodies was performed using a CSFV antibody test kit  
660 (positive blocking rate  $\geq 40\%$ , negative blocking rate  $\leq 30\%$ ). (A) Blocking rate of serum  
661 samples isolated from unvaccinated pigs. (B) Blocking rate of serum samples isolated from  
662 individuals immunized with attenuated vaccine strain of CSFV. (C) Sequence alignment  
663 between E2 from four different CSFV strains, one BVDV strain and one BDV strain. The  
664 conserved amino acid residues are highlighted in red, and the somatically mutated residues  
665 are highlighted in green (BVDV stains) and blue (BDV strains). (D) Frequency of  
666 epitope-specific, IgG<sup>+</sup> memory B cells in the peripheral blood of pig #3748. An unvaccinated  
667 pig, #3741, was used as the negative control. Flow cytometry plots display the percentage of  
668 IgG<sup>+</sup> B cells that bound to FITC-conjugated epitope-76 bait. (E) List of V (D) J segments of  
669 antibody genes that we isolated and germline (GL) assignment which were derived using the  
670 international ImMunoGeneTics information system (IMGT). (F) Analysis of the expression of  
671 the mAbs HK24 and HK44 via SDS-PAGE. Samples were resolved by reducing 12%  
672 SDS-PAGE, followed by staining with Coomassie blue. Lane M, marker protein; lane 1,  
673 porcine IgGs 8  $\mu\text{g}$ ; lane 2, porcine IgGs 20  $\mu\text{g}$ ; lane 3, mAb HK24; lane 4, mAb HK44; lane 5,  
674 supernatant of control HEK293T cells. The black arrows on the right indicate the antibody  
675 heavy chains (HC) and light chains (LC).

676

### 677 **Figure 2. Specific reactions of the mAbs HK24 and HK44 with epitope-76.**

678 (A) Fluorescence microscopic images of cells. Green fluorescence was only observed on cells  
679 transfected with the HK24 or HK44 expression vectors. Cells transfected with empty vectors  
680 served as a negative control. Scale bar, 200  $\mu\text{m}$ . (B) Analysis of the affinity of HK24 and  
681 HK44 for epitope-76. Affinity was analysed using FACS. NC is cells transfected with empty  
682 vectors. (C) Antibody specificity against epitope-76 was measured via a fluorescence assay.  
683 The mAbs HK24 and HK44 and positive IgGs isolated from pig #3748 were immobilized on  
684 an ELISA plate. Fluoresceinated epitopes were used to assess the binding activity of these  
685 antibodies. Epitope-75 is an unrelated epitope. The results from at least three biological  
686 replicates (mean  $\pm$  SD) and analysed using t tests with GraphPad Prism software. \*  $p < 0.05$ ,  
687 \*\*  $p < 0.005$ , and \*\*\*  $p < 0.0001$ .

688

### 689 **Figure 3. The mAbs HK24 and HK44 bound to the E2 protein.**

690 (A and B) The mAbs HK24 and HK44 bound to the CSFV E2 protein. Protein samples were  
691 obtained from PK-15 cells infected with CSFV. Uninfected PK-15 cells served as negative  
692 controls. All samples were resolved via 12% reducing SDS-PAGE and were identified using  
693 the mAbs HK24 (A) and HK44 (B).  $\beta$ -Actin was used as an internal control. (C) Recombinant  
694 CSFV E2 protein (690-866 aa) expressed in a bacterial system was recognized by the mAbs  
695 HK24 and HK44 and determined via Western blotting. (D) Detection of the binding of the  
696 mAbs HK24 and HK44 to the recombinant E2 protein using ELISA. Recombinant E2 protein  
697 (2  $\mu\text{g}/\text{ml}$ ) was used to coat the ELISA plates. The mAbs HK24 or HK44 (200  $\mu\text{g}/\text{ml}$ ), which  
698 were serially diluted in PBS, were added to each well. Negative IgGs were purified from  
699 CSFV-negative serum and used as a negative control. Results were obtained from at least

700 three biological replicates (mean  $\pm$  SD). (E) Detection of CSFV by the mAbs HK24 and  
701 HK44. PK-15 cells were infected with CSFV and identified via IFA using HK24, HK44,  
702 anti-CSFV swine serum and negative swine serum. Green fluorescence was observed on cells  
703 treated with HK24, HK44 and anti-CSFV swine serum. However, cells treated with negative  
704 serum showed no fluorescence. Scale bar, 200  $\mu$ m.

705

#### 706 **Figure 4. SPR binding assays.**

707 MAbs HK44 and HK24 bound to recombinant E2 protein. (A and B) Binding of E2 protein at  
708 concentrations of 2000, 1000, 500, 250 and 125 nM to mAbs (A) MAb HK44, (B) MAb  
709 HK24. The SPR data for each binding step were calculated and are shown in the table at the  
710 bottom. (C and D) Dose–response curve of the E2 binding signal. (C) The mAb HK44  
711 binding response against each concentration of E2 protein. (D) The mAb HK24 binding  
712 response against each concentration of E2 protein.

713

#### 714 **Figure 5. 3D modelling of the combination of the Fab fragments of mAbs HK24 and** 715 **HK44 with the CSFV E2 protein.**

716 (A and B) Cartoon representation of E2-HK44 and E2-HK24 protein complex. The best  
717 docking results are displayed by the surface. Light and heavy chains of the antibody are  
718 shown in slateblue and salmon, except for the CDR loops, which are shown in cyan and violet.  
719 The E2 protein is shown in pale green, except for the epitope, which is shown in green. (A)  
720 E2-HK44 protein complex. (B) E2-HK24 protein complex. (C and D) Bonds in the interface  
721 of the protein complex. Conventional hydrogen bond is colored in green, carbon hydrogen  
722 bond is colored in cyan, electrostatic (attractive charges and Pi-Cation) is colored in orange,  
723 Alkyl Hydrophobic is colored in pink, Pi-Sigma Hydrophobic is colored in purple. (C)  
724 E2-HK44 protein complex. (D) E2-HK24 protein complex. (E and F) The value of mutation  
725 energy during Virtual Alanine Mutation on the epitope-76 in the protein-protein complex. (E)  
726 E2-HK44 protein complex. (F) E2-HK24 protein complex.

727

#### 728 **Figure 6. The mAbs HK24 and HK44 neutralize CSFV.**

729 (A) The mAbs HK24 and HK44 were tested for neutralization reactivity with CSFV via the  
730 IFA neutralization assay. CSFV-positive serum isolated from pig #3748 served as the positive  
731 control, and CSFV-negative serum isolated from pig #3741 was used as the negative control.  
732 (B) The percentage of CSFV inhibition. The dashed line represents 50% inhibition of the  
733 virus compared to the virus-only control. (C and D) Neutralization activity of the mAbs HK24  
734 and HK44 was measured via quantitative qRT-PCR. (C) The number of CSFV copies in cells  
735 treated with the mAb HK24. (D) The number of CSFV copies in cells treated with the mAb  
736 HK44. Results were obtained from at least three biological replicates (mean  $\pm$  SD) and  
737 analyzed using t tests with GraphPad Prism software. \*  $p < 0.05$ , \*\*  $p < 0.005$ , and \*\*\*  $p < 0.0001$   
738 (versus the positive serum).

739

#### 740 **Figure S1. Physical maps of the expression vectors of the mAbs HK24 and HK44.**

741 Plasmid pEGFP-C1 was selected as the backbone, and the CMV promoter was substituted by  
742 the EF1 $\alpha$  promoter. (A) P24H is the expression vector of the kappa light chains of HK24. (B)  
743 P24K is the expression vector of the heavy chains of HK24. (C) P44H is the expression vector

744 of the kappa light chains of HK44. (D) P44K is the expression vector of the heavy chains of  
745 HK44.

747 **TABLE 1.** Oligoes used in this study.

| Oligo name               | Sequences (5'→3')                              | 748 |
|--------------------------|------------------------------------------------|-----|
| E2-F                     | CATG <u>CCATGG</u> CTCGGCTAGCCTGCAAGG          | 749 |
| E2-R                     | CCG <u>CTCGAG</u> TAGATCTTCATTTTCCACTGTGGTGGTC | 750 |
| IGH F1                   | GTGTCCAGGGTGAGGAGAAGCTG                        | 751 |
| IGH F2                   | GTGTCCAGGGTCAGGAGAAGCTG                        | 752 |
| IGH F3                   | GTGTCCAGGGTGAGGTGAAGCTG                        | 753 |
| IGH R                    | CGGTGATGCACGAGGCTCTGCACAACCA                   | 754 |
| IGK F1                   | GCCATCCAGCTGACCCAGTCTCCAGCCTCC                 | 755 |
| IGK F2                   | GCCATYGTGCTGACCCAGASTCCACTCTC                  | 756 |
| IGK F3                   | GAAATTGTGCTGACCCAGTCTGCAGCC                    | 757 |
| IGK F4                   | GAAACAACAGTCACTCAATCTCCAGCAT                   | 758 |
| IGK R                    | AGCCTCACACTCGTTCCTGYTGAAGCTTTTG                | 759 |
| IGL F1                   | TCCTATGAGGTGACTCAGCCACCCT                      | 760 |
| IGL F2                   | TCCTATGAGCTGACCCAGCCGTCTT                      | 761 |
| IGL F3                   | TCTTCTAAGCTGACTCAGCCCCCG                       | 762 |
| IGL F4                   | CAGTCTGCCCTGACTCAGCCCCCCT                      | 763 |
| IGL F5                   | TCTCAGACTGTGATCCAGGAGCCGG                      | 764 |
| IGL F6                   | TCCCTCTCCCAGGCTGTGCTGA                         | 765 |
| IGL F7                   | TCCCAGATGGTGACTCAGGAA                          | 766 |
| IGL F8                   | CCAAGCTGTGTGACTCAGGAACC                        | 767 |
| IGL R                    | GGCGCACTCGGAGGGCGTCACTGTCTT                    | 768 |
| IS                       | AAGCAGTGGTATCAACGCAGAGT                        | 769 |
| Oligo-dT <sub>30</sub> N | AAGCAGTGGTATCAACGCAGAGTACT <sub>30</sub> VN    | 770 |
| TSO                      | AAGCAGTGGTATCAACGCAGAGTACATrGrG+G              | 771 |
| CSFV F                   | CTAGCCATGCCACAGTAGGA                           | 772 |
| CSFV R                   | CTCCATGTGCCATGTACAGCA                          | 773 |

774 Underlining indicates NcoI and XhoI sequences.

775

776

777

778

779

780

781

782

783

784

785 **TABLE 2.** Intermolecular force affecting the interaction of mAb HK44 and E2 proteins.

| Intermolecular force               | Amino acid               |
|------------------------------------|--------------------------|
| Conventional Hydrogen Bond         | Arg64 (HC):Glu152 (E2)   |
|                                    | Ser145 (E2):Asp111Z (HC) |
|                                    | Ala143 (E2):Asp34 (LC)   |
|                                    | Ser145 (E2):Asp111Z (HC) |
|                                    | Pro146 (E2):Asp111Z (HC) |
| Carbon Hydrogen Bond               | Thr147 (E2):Leu108 (LC)  |
|                                    | Thr147 (E2):Tyr116 (LC)  |
|                                    | Ser111B (HC):Thr88 (E2)  |
|                                    | Pro90 (E2):Tyr111 (HC)   |
| Electrostatic (Attractive Charges) | Arg64 (HC): Glu152 (E2)  |
| Electrostatic (Pi-Cation)          | Arg150 (E2):Phe111X (HC) |
| Alkyl Hydrophobic                  | Pro146 (E2):Leu108 (LC)  |
|                                    | Val111A (HC):Pro90 (E2)  |
|                                    | His31(LC):Pro146(E2)     |
| Pi-Sigma Hydrophobic               | Tyr38(LC):Pro146(E2)     |
|                                    | Tyr110(HC):Ala143(E2)    |

786 HC: Heavy Chain; LC: Light Chain; E2: E2 protein.

787

788

789

790

791

792

793

794

795

796

797

798

799

800

801

802

803

804

805

806

807

808

809 **TABLE 3.** Intermolecular force affecting the interaction of mAb HK24 and E2 proteins.

| Intermolecular force       | Amino acid               |
|----------------------------|--------------------------|
| Conventional Hydrogen Bond | Ser36 (LC):Val144 (E2)   |
|                            | Ser109 (LC):Thr147 (E2)  |
|                            | Thr147 (E2):Leu114 (LC)  |
|                            | Asn111A (HC):Gly87 (E2)  |
|                            | Asn111A (HC):Asp86 (E2)  |
|                            | Ser36 (LC):Val144 (E2)   |
| Carbon Hydrogen Bond       | Pro146 (E2):Ser109 (LC)  |
|                            | Pro146 (E2):Ser28 (LC)   |
|                            | Thr147 (E2):Leu114 (LC)  |
| Alkyl Hydrophobic          | Asn111A (HC):Gly87 (E2)  |
|                            | Ala143 (E2):Cys111Y (HC) |
|                            | Pro146 (E2):Ile29 (LC)   |

810 HC: Heavy Chain; LC: Light Chain; E2: E2 protein.

811

812

813

814

815

816

817

818

819

820

821

822

823

824

825

826

827

828

829

830

831

832

833

834

835

836

837 Fig. 1

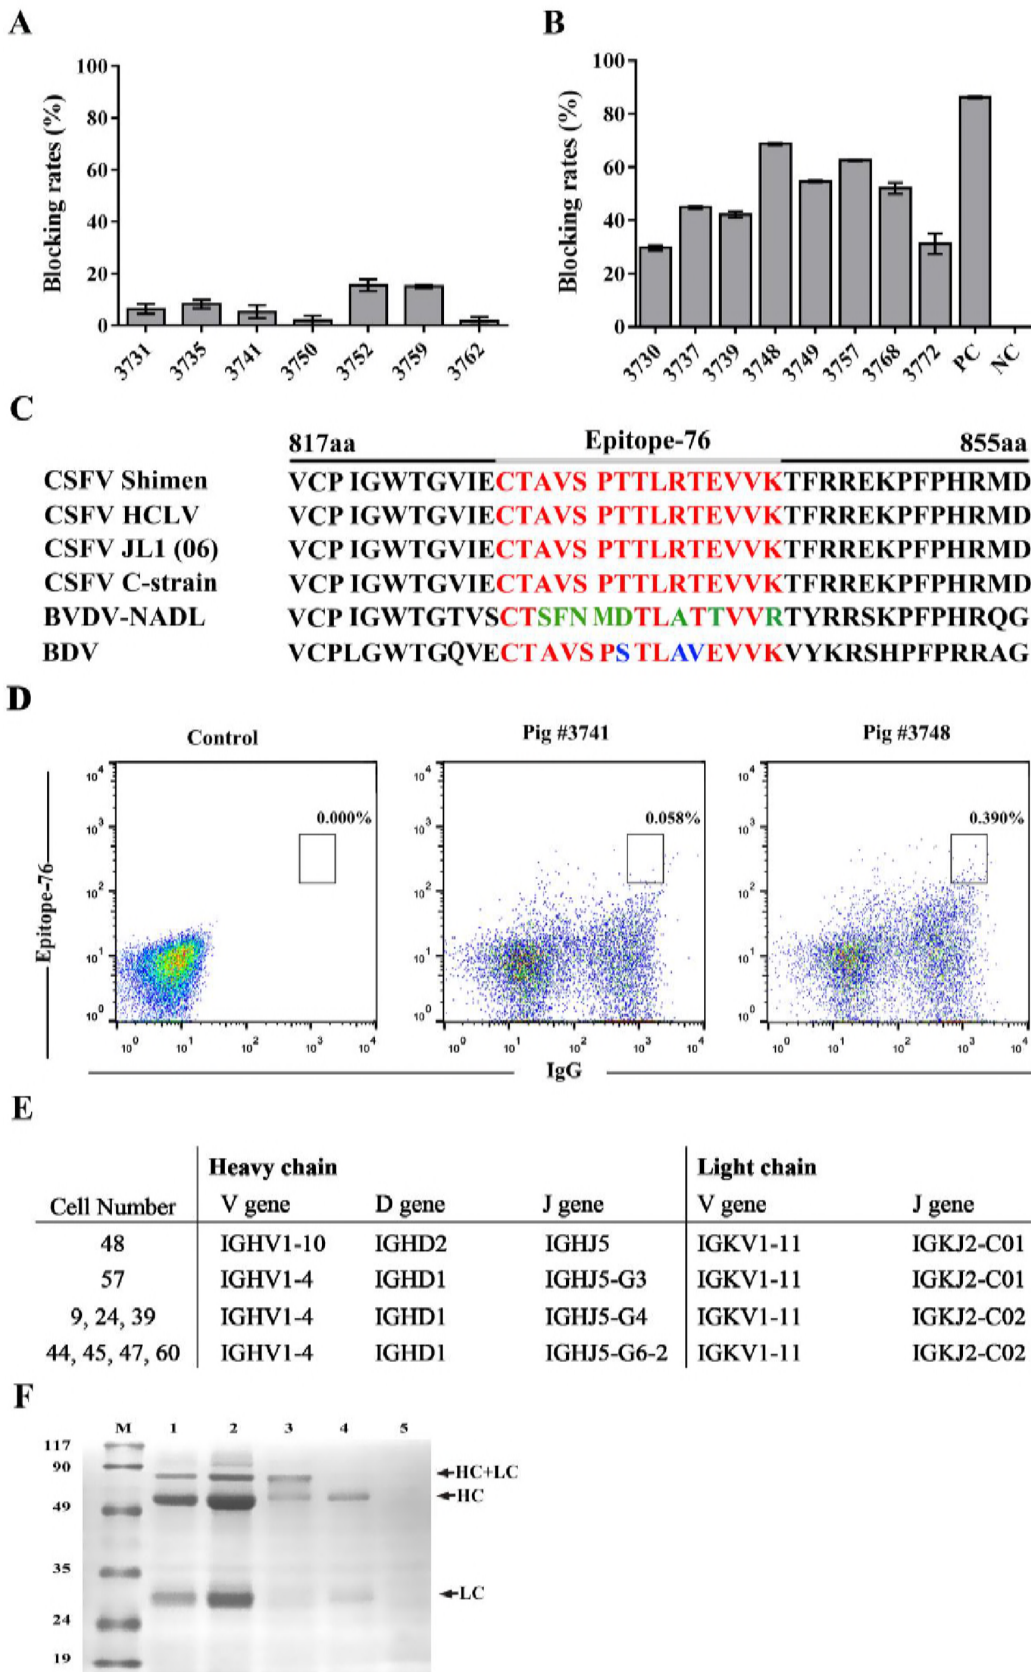

838

839

840



841 Fig. 2

A

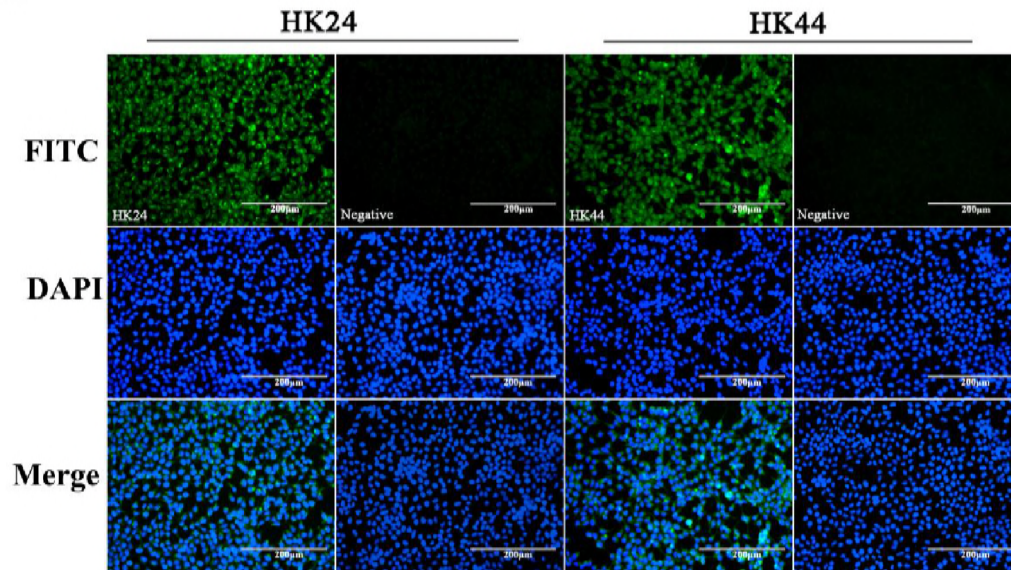

B

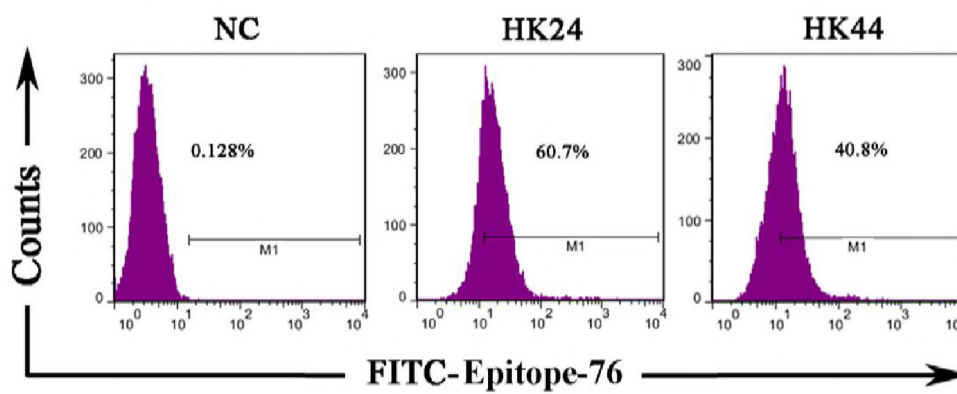

C

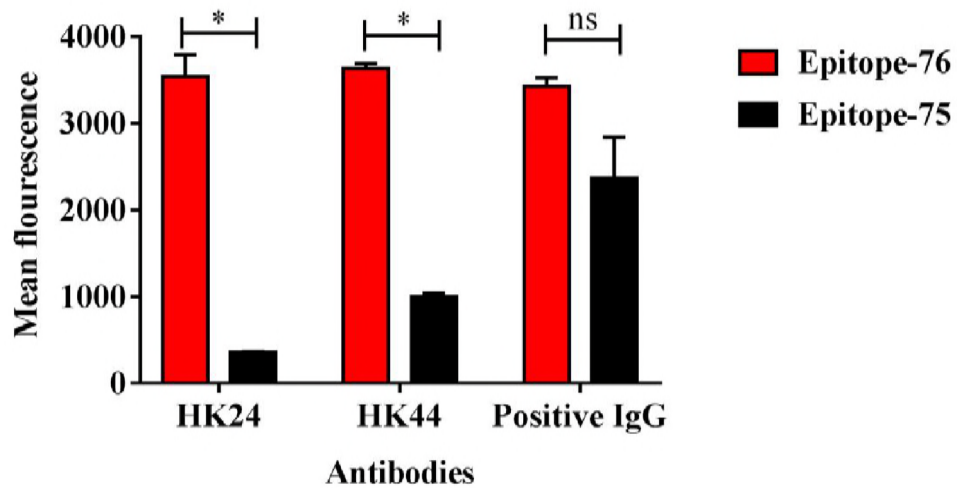

842

843

844

845

846

847 Fig. 3

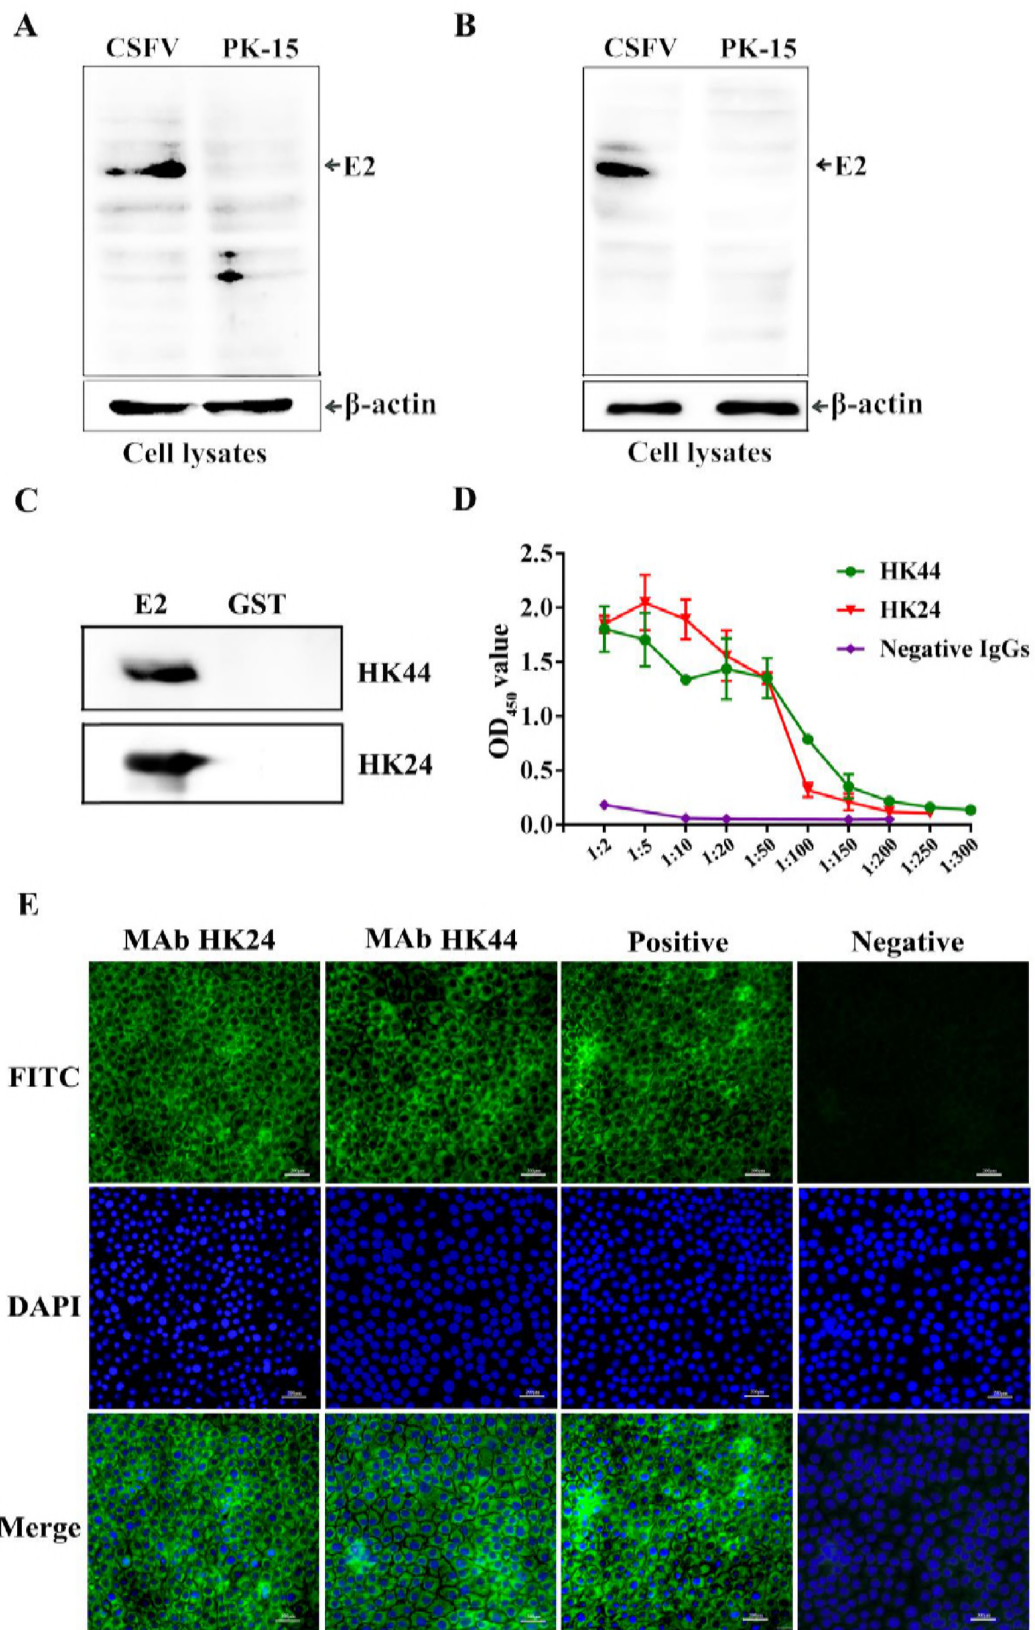

848

849

850

851

852 Fig. 4

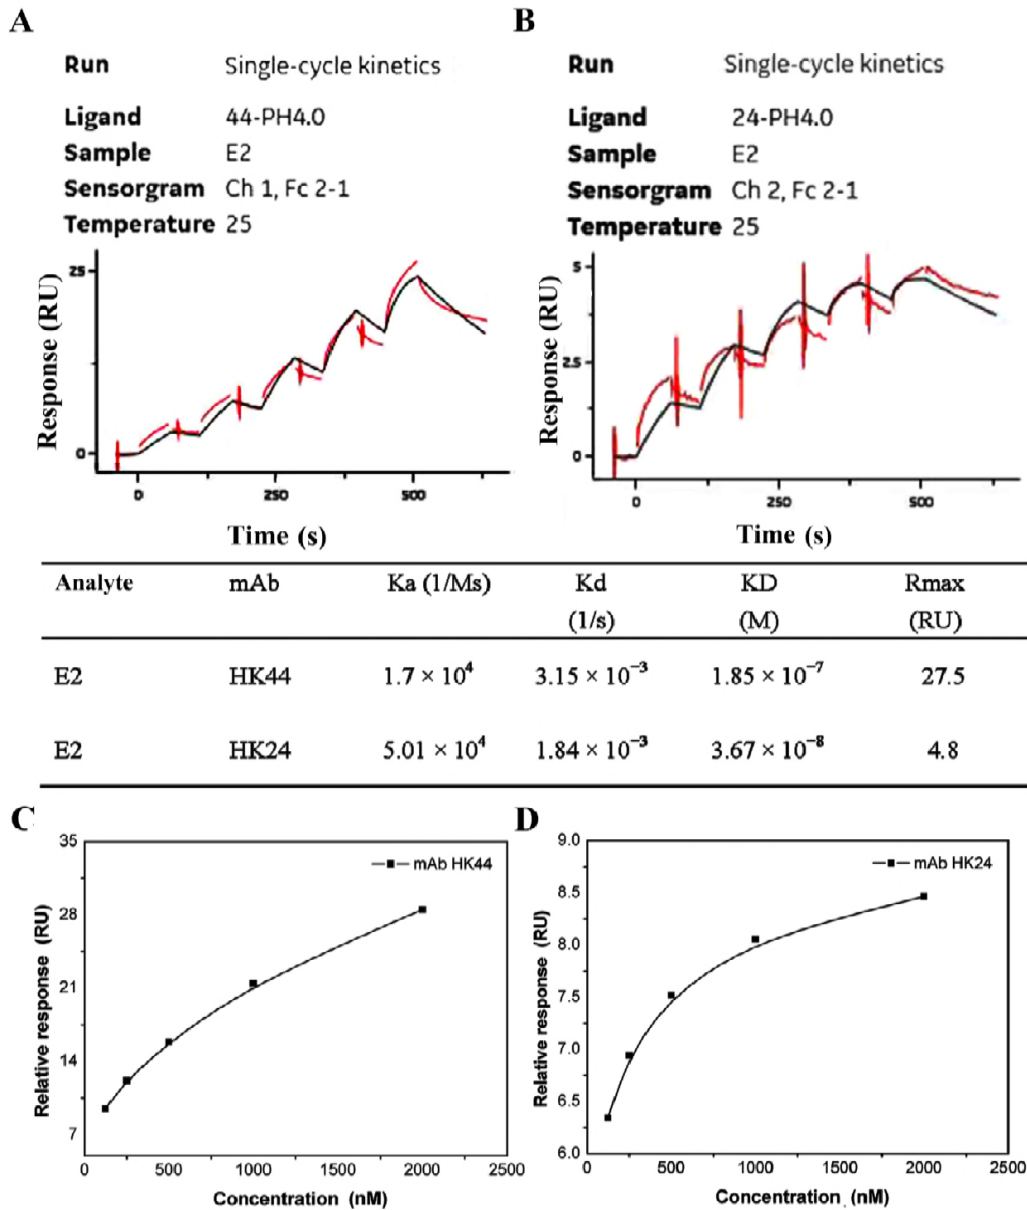

853

854

855

856

857

858

859

860

861

862

863

864

865

866

867 Fig. 5

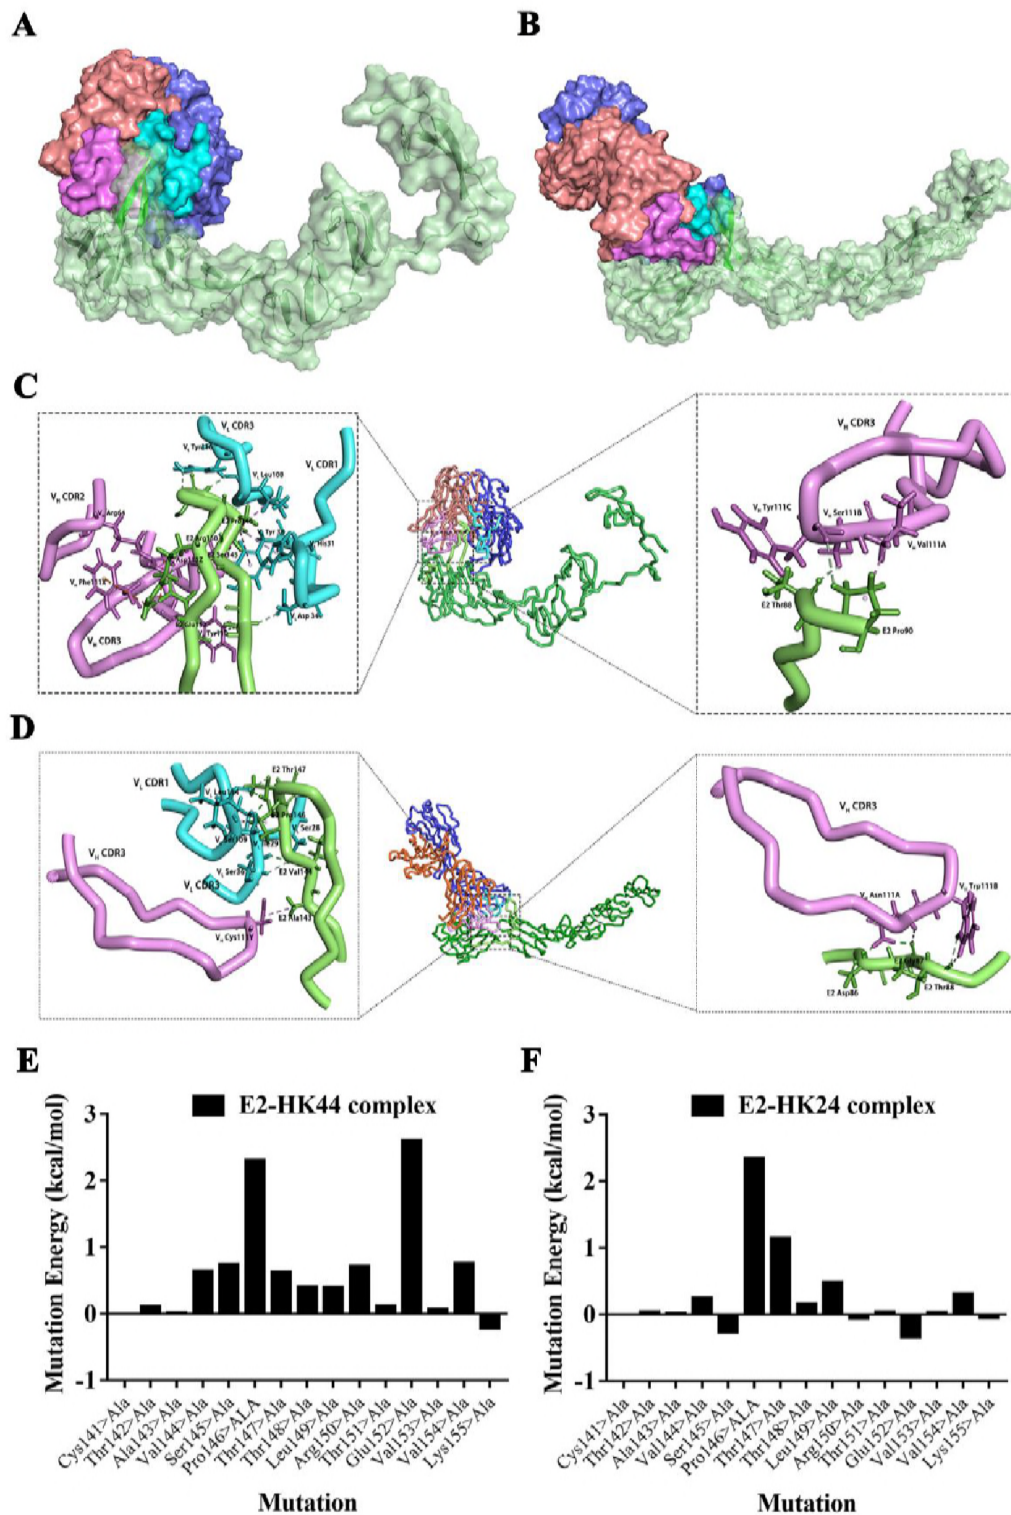

868

869

870

871

872

873

874 Fig. 6

875

876

877

878

879

880

881

882

883

884

885

886

887

888

889

890

891

892

893

894

895

896

897

898

899

900

901

902

903

904

905

906

907

908

909

910

911

912

913

914

915

916

917

**A**

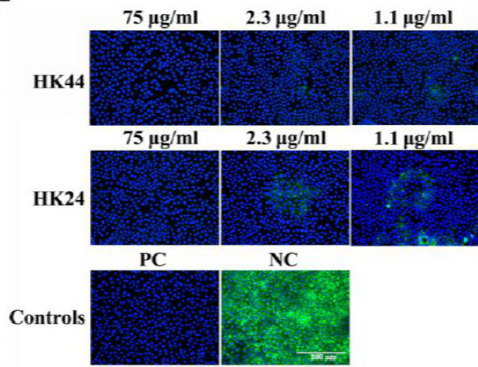

**B**

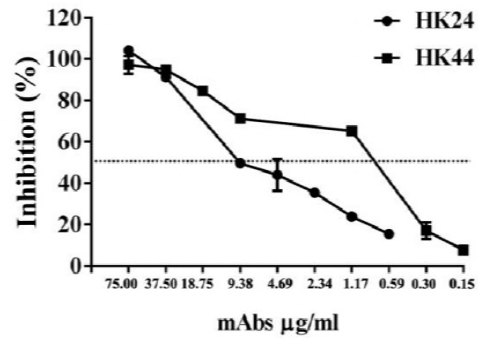

**C**

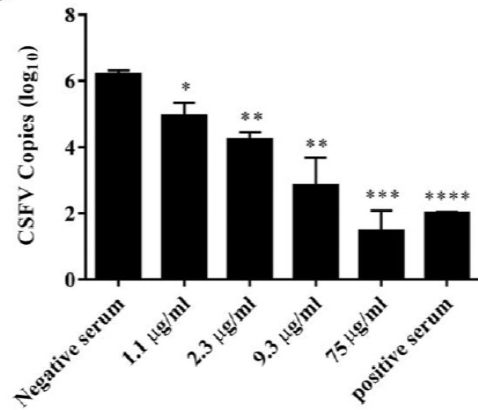

**D**

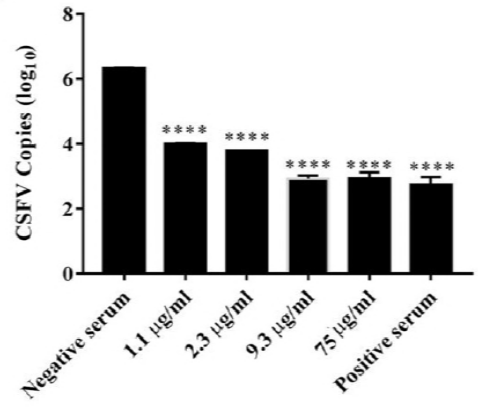

918 Fig. S1

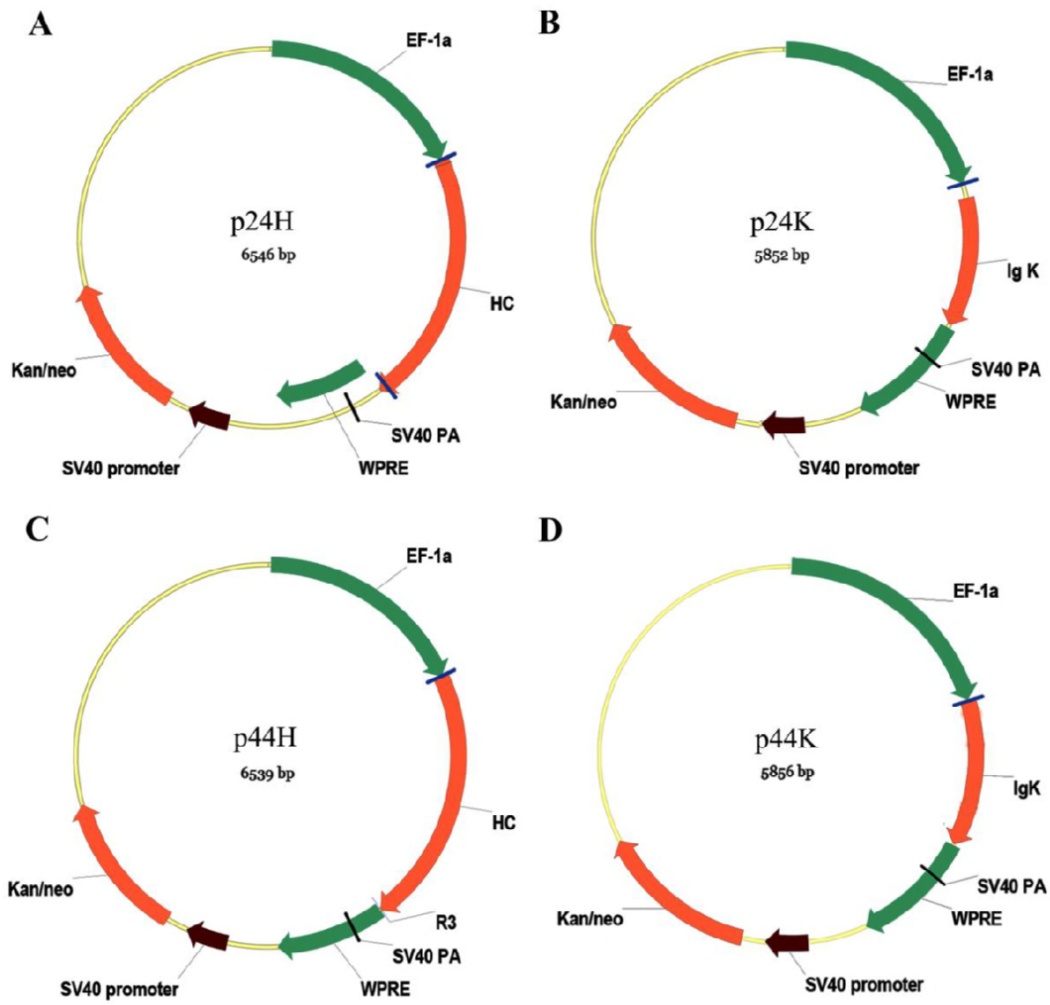

919

920

921

922

923

924

925

926

927

928

929

930

931

932

933

934

935

936

937

938

939

940

941

942

943

944

945

946

947

948

949

950

951

952

953

954

955

956

957

958

959

960

961

962

963
